# Supplementary material for: The Acquired Vulnerability Caused by CDK4/6 Inhibition Promotes Drug Synergism Between Oxaliplatin and Palbociclib in Cholangiocarcinoma
Source: PubMed Central journal article supplement (PMC9157389; doi:10.3389/fonc.2022.877194), 2022-05-17
Supplement: DataSheet_1.pdf [file DataSheet_1.pdf]

# Supplementary figure 1

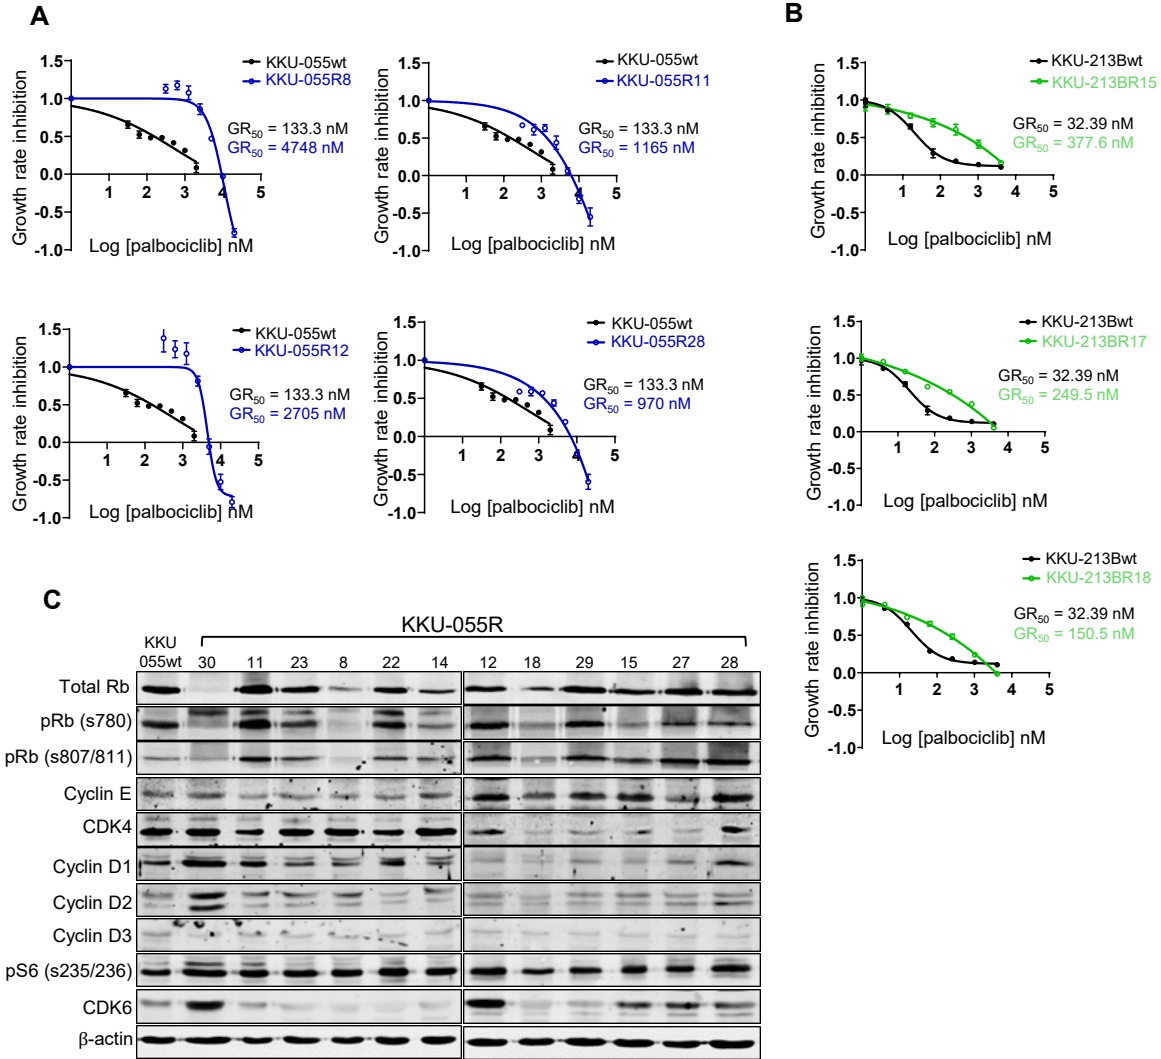

(A-B) Palbociclib dose-response curves of the KKKU-055wt and KKKU-055 resistant clones (A) and the KKKU-213Bwt and KKKU-213B resistant clones (B).

(C) Western blots of cell cycle proteins in the KKKU-055wt and resistant clones.

# Supplementary figure 2

**A**

|              |     |     |     |     |     |     |     |     |     |     |     |     |     |     |     |     |     |     |     |     |     |     |     |     |     |     |     |     |     |
|--------------|-----|-----|-----|-----|-----|-----|-----|-----|-----|-----|-----|-----|-----|-----|-----|-----|-----|-----|-----|-----|-----|-----|-----|-----|-----|-----|-----|-----|-----|
| Oxaliplatin  | R24 | R30 | R22 | R25 | R26 | R17 | R19 | R27 | R12 | R7  | R11 | R3  | R15 | R29 | R1  | R2  | R20 | R23 | R8  | R10 | R6  | R5  | R28 | R14 | R13 | R18 | R9  | R21 | R4  |
| Nutlin-3     | R11 | R25 | R7  | R17 | R14 | R27 | R24 | R1  | R26 | R15 | R22 | R13 | R3  | R29 | R30 | R9  | R10 | R6  | R20 | R5  | R8  | R28 | R12 | R18 | R23 | R21 | R2  | R4  | R19 |
| Everolimus   | R5  | R1  | R13 | R24 | R25 | R20 | R30 | R7  | R21 | R6  | R3  | R14 | R2  | R15 | R10 | R17 | R11 | R9  | R12 | R28 | R22 | R27 | R4  | R8  | R29 | R23 | R19 | R18 | R26 |
| Vorinostat   | R7  | R29 | R10 | R15 | R30 | R24 | R6  | R11 | R21 | R13 | R12 | R1  | R17 | R19 | R26 | R25 | R5  | R27 | R14 | R3  | R20 | R22 | R4  | R9  | R18 | R8  | R23 | R28 | R2  |
| LCL161       | R1  | R10 | R12 | R24 | R11 | R3  | R5  | R13 | R21 | R27 | R28 | R25 | R17 | R20 | R7  | R19 | R22 | R14 | R8  | R9  | R26 | R2  | R23 | R30 | R6  | R15 | R4  | R29 | R18 |
| Lapatinib    | R19 | R11 | R1  | R7  | R22 | R24 | R13 | R27 | R14 | R8  | R9  | R26 | R2  | R17 | R23 | R5  | R25 | R20 | R30 | R21 | R6  | R3  | R15 | R10 | R12 | R28 | R4  | R29 | R18 |
| Methotexate  | R24 | R27 | R1  | R30 | R6  | R20 | R9  | R8  | R21 | R2  | R17 | R5  | R14 | R23 | R7  | R15 | R12 | R13 | R11 | R28 | R4  | R3  | R25 | R10 | R19 | R22 | R26 | R29 | R18 |
| Rapamycin    | R1  | R20 | R13 | R6  | R11 | R24 | R14 | R21 | R3  | R9  | R15 | R25 | R17 | R10 | R28 | R12 | R27 | R30 | R8  | R4  | R29 | R19 | R23 | R7  | R26 | R22 | R5  | R18 | R2  |
| Trichostatin | R26 | R22 | R19 | R7  | R11 | R8  | R25 | R13 | R1  | R20 | R24 | R9  | R27 | R29 | R17 | R5  | R30 | R15 | R3  | R4  | R28 | R14 | R2  | R6  | R21 | R23 | R10 | R12 | R18 |
| Bupalisib    | R24 | R28 | R10 | R30 | R1  | R25 | R5  | R2  | R20 | R11 | R14 | R15 | R24 | R21 | R7  | R13 | R6  | R3  | R4  | R22 | R27 | R9  | R17 | R19 | R8  | R18 | R28 | R26 | R29 |
| MK2206       | R14 | R17 | R9  | R7  | R30 | R15 | R12 | R8  | R21 | R13 | R11 | R20 | R2  | R28 | R24 | R5  | R1  | R4  | R3  | R23 | R27 | R9  | R10 | R19 | R22 | R6  | R6  | R29 | R18 |
| Vandetanib   | R11 | R5  | R20 | R14 | R13 | R9  | R1  | R22 | R4  | R7  | R3  | R15 | R17 | R21 | R6  | R27 | R23 | R26 | R12 | R24 | R19 | R8  | R25 | R29 | R30 | R28 | R2  | R10 | R18 |
| Sunitinib    | R22 | R26 | R8  | R14 | R20 | R27 | R4  | R17 | R9  | R6  | R1  | R7  | R19 | R21 | R28 | R23 | R13 | R15 | R11 | R24 | R3  | R25 | R10 | R12 | R30 | R29 | R5  | R18 | R2  |
| PHA665752    | R30 | R11 | R14 | R3  | R4  | R5  | R6  | R7  | R8  | R9  | R10 | R1  | R12 | R13 | R2  | R15 | R17 | R18 | R19 | R20 | R21 | R22 | R23 | R24 | R25 | R26 | R27 | R28 | R29 |
| Topotecan    | R30 | R1  | R2  | R3  | R4  | R5  | R6  | R7  | R8  | R9  | R10 | R11 | R12 | R13 | R14 | R15 | R17 | R18 | R19 | R20 | R21 | R22 | R23 | R24 | R25 | R26 | R27 | R28 | R29 |

**B**

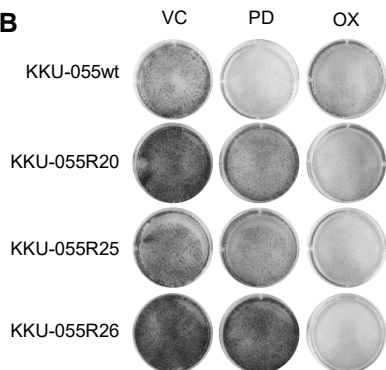

**C**

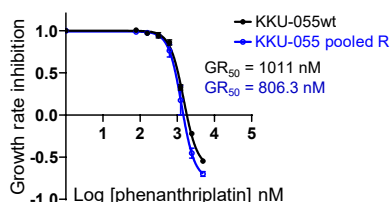

**D**

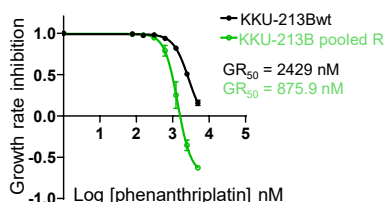

**E**

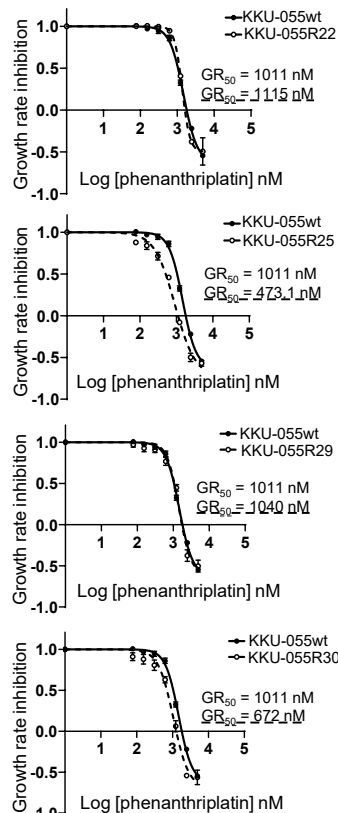

**F**

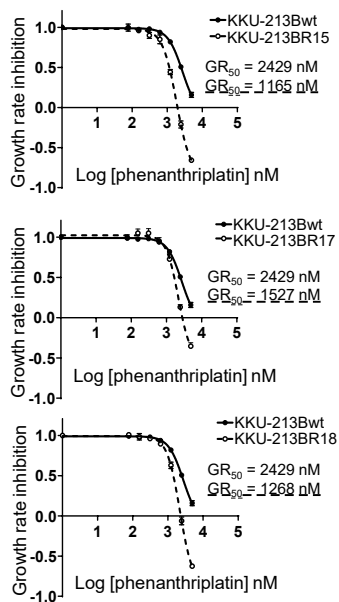

**G**

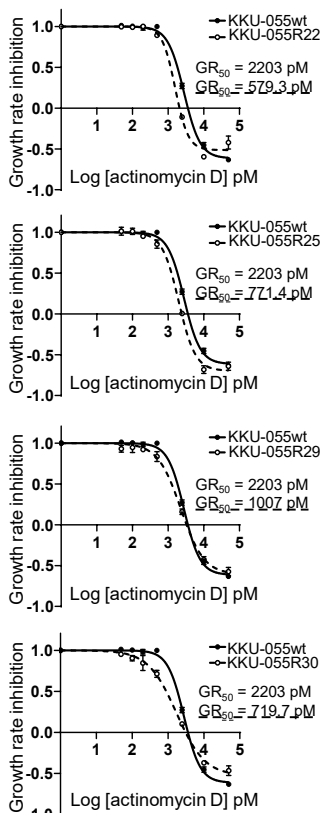

**H**

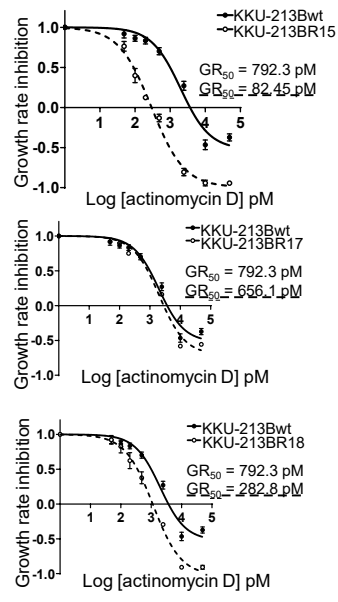

(A) Top 15 drugs which more effective in KKU-055 resistant clones compared to the parental counterpart. Clone numbers shown in red. The clones which were less sensitive were shown in yellow. Oxaliplatin was effective in 25 out of 29 resistant clones.

(B) Clonogenic survival assay of KKU-055wt and resistant clones treated with Palbociclib, Oxaliplatin, or vehicle. Images show representative wells of triplicates.

(C-D) Phenanthriplatin dose-response curves of the KKU-055wt (C), KKU-213Bwt (D), and pooled resistant cells.

(E) Phenanthriplatin dose-response curves for KKU-055wt and resistant clones.

(F) Phenanthriplatin dose-response curves for KKU-213Bwt and resistant clones.

(G) Actinomycin D dose-response curves for KKU-055wt and resistant clones.

(H) Actinomycin D dose-response curves for KKU-213Bwt and resistant clones.

Error bars represent standard deviation of triplicate cultures.

**Supplementary figure 3**

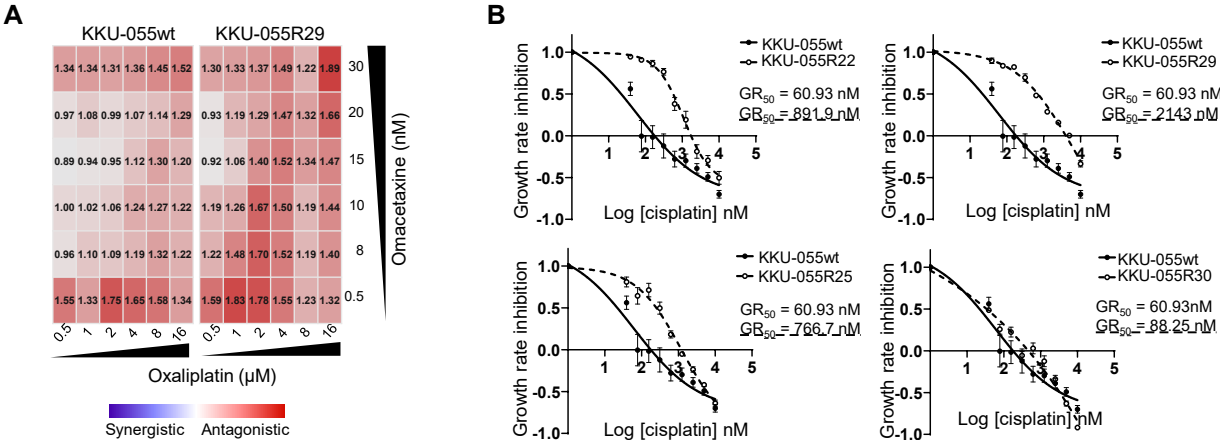

(A) Combination index matrices of indicated doses Omacetaxine and Oxaliplatin combination pairs in the KKU-055wt and resistant clone R29. Colors in the matrix indicate different levels of drug effect (synergistic appeared in blue and antagonistic effect appeared in red).

(B) Cisplatin dose-response curves of KKU-055wt and a resistant clones.

## Supplementary figure 4

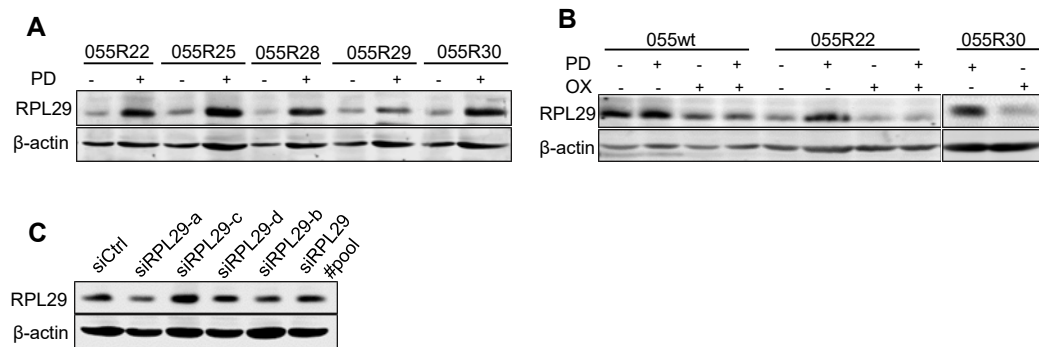

(A) Western blots of RPL29 KKU-055 resistant clones, with or without 1  $\mu$ M Palbociclib treatment for 24 hours.

(B) Western blots of RPL29 in KKU-055wt, and resistant clones (R22, R30) under a vehicle, Palbociclib, Oxaliplatin, or combination treatment.

(C) Western blots of RPL29 expressions in the KKU-055 resistant clone R29 transfected with non-targeting siRNA (siCtrl) or RPL29 siRNA (siRPL29-a to d and pooled).

Supplementary figure 5

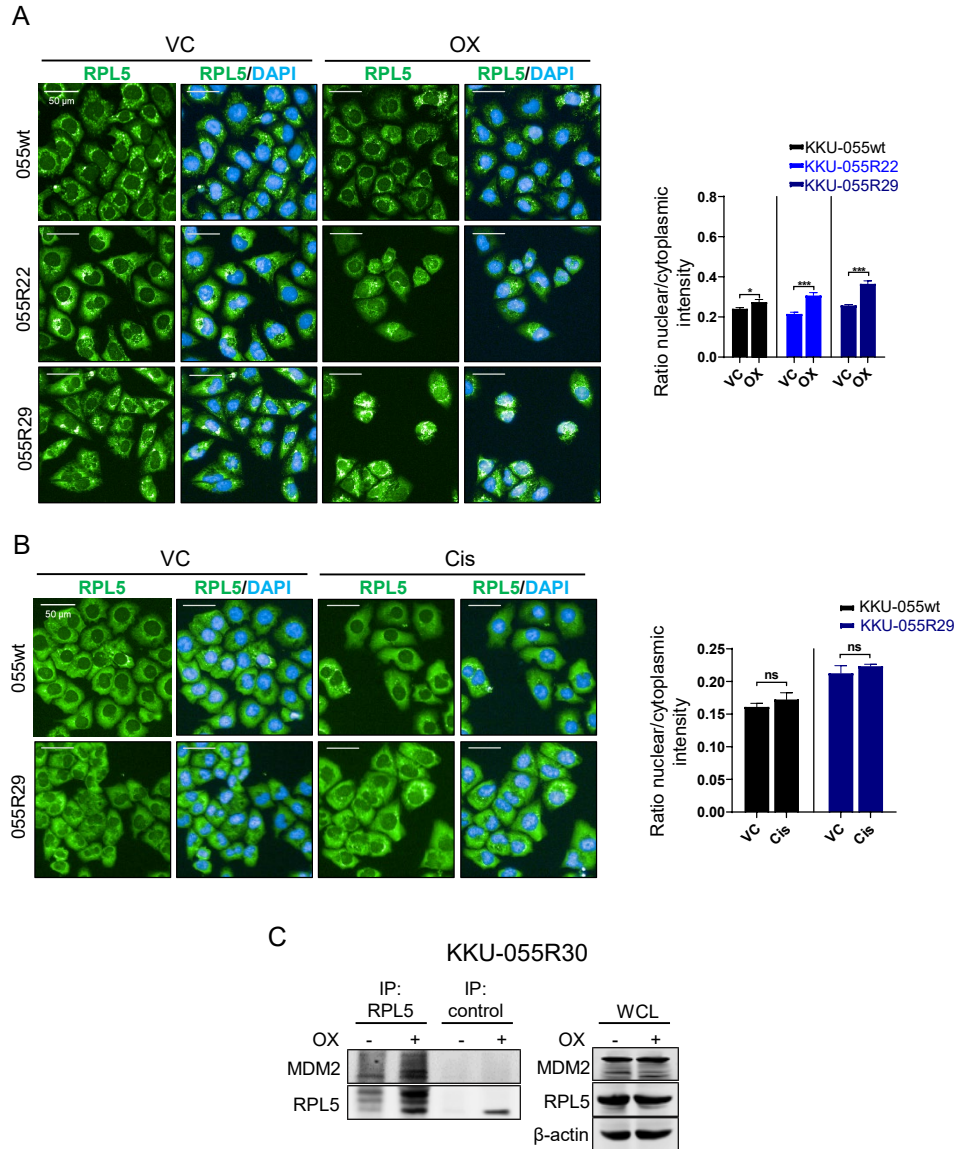

(A-B) Fluorescent images of RPL5 in the KKKU-055wt and the KKKU-055 resistant clones after 24 hours treatment with 5  $\mu$ M Oxaliplatin (A), 0.5  $\mu$ M cisplatin (B) or vehicle. DAPI was stained to identify the nucleus. Percent intensity was quantified in a bar graph. The bars represent the averages of 3 replicates  $\pm$  SD. Statistical significances were analyzed by Student's t-test ( $*p \leq 0.05$ ,  $**p \leq 0.01$ , and  $***p \leq 0.001$ ).

(C) Western blots of KKKU-055 resistant clone R30 after immunoprecipitation of RPL5 complexes (left), and whole-cell lysate (WCL) after 24 hours treatment with 5  $\mu$ M Oxaliplatin or vehicle (right).

# Supplementary figure 6

**A**

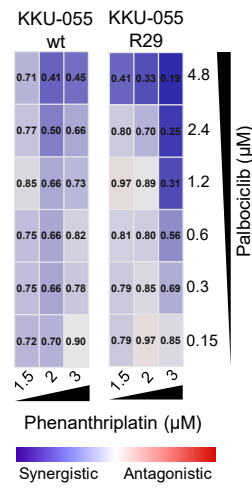

**B**

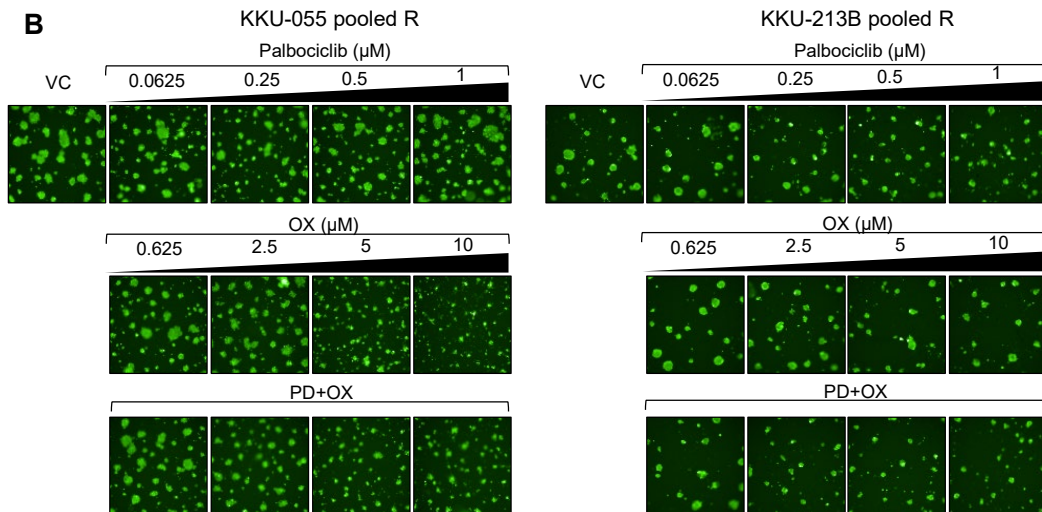

**C**

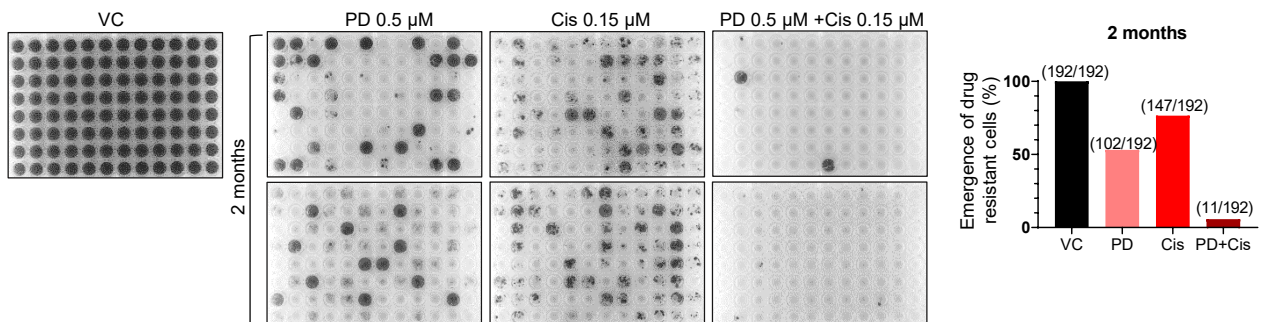

**(A)** Combination index matrices of indicated doses Palbociclib and phenanthriplatin combination treatment in the K KU-055wt and resistant clone R29. Colors in the matrix indicate different levels of drug effect (synergistic: blue, antagonistic: red).

**(B)** Images of the K KU-055 (pooled) resistant spheroids (left), the K KU-213B (pooled) resistant spheroids (right) treated with indicated doses of Palbociclib, Oxaliplatin, the combination, or vehicle. Images show representative wells of triplicates.

**(C)** The emergence of the drug-resistant cells was shown in crystal violet stained images. Two months cultures of K KU-055wt cells under 0.5  $\mu$ M Palbociclib, 0.5  $\mu$ M cisplatin, and the combination of both in 2 of 96-well plates (192 wells). the number of emergences well was count and plot in a bar graph (right)
